# Supplementary material
Source: PubMed Central journal article supplement (PMC5573237)
Supplement: NIHMS891735-supplement-supplement_1.pdf [file NIHMS891735-supplement-supplement_1.pdf]

SUPPLEMENTAL TABLE 1

## Baseline population difference between survey responders and nonresponders

| Variable n (%) unless otherwise noted | Total enrolled with baseline and medical records<br>N = 208 | Responders<br>at 1 mo<br>N = 185 | Nonresponders<br>N = 23 |
|---------------------------------------|-------------------------------------------------------------|----------------------------------|-------------------------|
| Age, y, mean (SD) [range]             | 56.5 (14) [22–93]                                           | 56.5 (13) [27–89]                | 56.4 (16) [22–93]       |
| Race                                  |                                                             |                                  |                         |
| White                                 | 163 (78)                                                    | 143 (77)                         | 20 (87)                 |
| Black                                 | 35 (17)                                                     | 32 (17)                          | 3 (13)                  |
| Other                                 | 10 (5)                                                      | 10 (5)                           | 0                       |
| Insurance                             |                                                             |                                  |                         |
| None                                  | 15 (7)                                                      | 14 (8)                           | 1 (4)                   |
| Medicare                              | 11 (5)                                                      | 8 (4)                            | 3 (13)                  |
| Medicaid                              | 7 (3)                                                       | 7 (4)                            | —                       |
| Private                               | 175 (84)                                                    | 156 (84)                         | 19 (83)                 |
| Marital status                        |                                                             |                                  |                         |
| Partnered                             | 125 (60)                                                    | 114 (62)                         | 11 (48)                 |
| Single                                | 60 (29)                                                     | 51 (28)                          | 9 (39)                  |
| Widowed                               | 23 (11)                                                     | 20 (11)                          | 3 (13)                  |
| Employment                            |                                                             |                                  |                         |
| No                                    | 109 (52)                                                    | 98 (53)                          | 11 (48)                 |
| Yes                                   | 99 (48)                                                     | 86 (47)                          | 12 (52)                 |
| Cancer, $P = .075$                    |                                                             |                                  |                         |
| Yes                                   | 151 (73)                                                    | 131 (71)                         | 20 (87)                 |
| No                                    | 57 (27)                                                     | 54 (29)                          | 3 (13)                  |
| Cancer site, $P = .058$               |                                                             |                                  |                         |
| Uterine                               | 93 (45)                                                     | 84 (45)                          | 9 (39)                  |
| Ovary                                 | 32 (15)                                                     | 23 (12)                          | 9 (39)                  |
| Cervix                                | 18 (9)                                                      | 17 (9)                           | 1 (4)                   |
| Vulva/vaginal                         | 4 (2)                                                       | 3 (1.6)                          | 1 (4)                   |
| Gynecologic NOS                       | 1 (0.5)                                                     | 1 (0.5)                          | 0                       |
| Nongynecologic                        | 3 (1.4)                                                     | 3 (1.6)                          | 0                       |
| Benign                                | 57 (27)                                                     | 54 (29)                          | 3 (13)                  |
| Major comorbidity                     |                                                             |                                  |                         |
| No                                    | 183 (88)                                                    | 163 (88)                         | 20 (87)                 |
| Yes                                   | 25 (12)                                                     | 22 (12)                          | 3 (13)                  |
| BMI mean (SD) [range]                 | 33.0 (9) [17–58]                                            | 32.9 (9) [17–58]                 | 33.7 (9) [21–52]        |

Doll et al. Impact of surgical complications on health-related quality of life. Am J Obstet Gynecol 2016. (continued)

## SUPPLEMENTAL TABLE 1

**Baseline population difference between survey responders and nonresponders** (continued)

| Variable n (%) unless otherwise noted | Total enrolled with baseline and medical records<br>N = 208 | Responders at 1 mo<br>N = 185 | Nonresponders<br>N = 23 |
|---------------------------------------|-------------------------------------------------------------|-------------------------------|-------------------------|
| <b>Procedure type</b>                 |                                                             |                               |                         |
| MIS                                   | 130 (63)                                                    | 116 (63)                      | 14 (61)                 |
| Laparotomy                            | 69 (33)                                                     | 60 (32)                       | 9 (39)                  |
| Debulking                             | 26 (13)                                                     | 20 (10)                       | 6 (26)                  |
| Radical hysterectomy                  | 13 (6)                                                      | 13 (7)                        | 0                       |
| Bowel                                 | 14 (7)                                                      | 12 (7)                        | 2 (9)                   |
| <b>Outcomes</b>                       |                                                             |                               |                         |
| Complication                          | 55 (26)                                                     | 47 (25)                       | 8 (35)                  |
| Grade $\geq 3$                        | 6 (12)                                                      | 6                             | 0                       |

Main differences between responders and nonresponders: cancer, ovary site of cancer, debulking procedure (surgery for ovarian cancer), and postoperative morbidity all more common in nonresponders than responders. This is expected pattern.

*BMI*, body mass index; *MIS*, minimally invasive surgery; *NOS*, not otherwise specified.

*Doll et al. Impact of surgical complications on health-related quality of life. Am J Obstet Gynecol 2016.*

**SUPPLEMENTAL TABLE 2**  
**Postoperative complications****Postoperative morbidity**  
**N = 62 events among 47 patients**

---

Wound infection (15)  
Wound opening (10)  
Ileus (4)  
Blood transfusion (4)  
Abdominal/pelvic abscess (3)  
UTI (9)  
Cardiac event (1)  
Organ injury (3)  
Psychiatric (1)  
Fistula (1)  
Pulmonary event (3)  
Renal insufficiency (1)  
Miscellaneous<sup>a</sup> (7)

---

UTI, urinary tract infection.

<sup>a</sup> Difficulty ambulating requiring therapy intervention (3), wound hematoma requiring drainage (2), lymphedema requiring outpatient referral (1), urinary retention requiring prolonged catheterization (1).

Doll et al. *Impact of surgical complications on health-related quality of life. Am J Obstet Gynecol* 2016.

**SUPPLEMENTAL TABLE 3****Changes in anxiety from baseline to 1 month postsurgery, by occurrence of any 30-day complication, n (%)**

| Change in anxiety measure <sup>a</sup> | Total   | No complications | All complications |
|----------------------------------------|---------|------------------|-------------------|
| Anxiety decreased                      | 93 (50) | 77 (56)          | 16 (34)           |
| No change                              | 65 (35) | 43 (31)          | 22 (47)           |
| Anxiety increased                      | 27 (15) | 18 (13)          | 9 (19)            |

<sup>a</sup> Fisher exact  $P = .032$ .Doll et al. Impact of surgical complications on health-related quality of life. *Am J Obstet Gynecol* 2016.
